# Supplementary material for: Reprogramming of arachidonate metabolism confers drug resistance to glioblastoma through Enhancing Mitochondrial Activity in Fatty Acid Oxidation
Source: Research Square preprint supplement (doi:10.21203/rs.3.rs-965026/v1), 2021-10-18
Supplement: Supplementary file 1 [file 5f6aab75b494b6fa99378b72.docx]

**Supplementary Table 3. The chemicals used in this study**

| Name | Cat. number | Company |
| --- | --- | --- |
| Temozolomide (TMZ) | T2577 | Sigma-Aldrich, St. Louis, MO, USA |
| Prostaglandin E2 (PGE2) | 14010 | Cayman, Ann Arbor, MI, USA |
| 16,16-dimethyl PGE2 (dmPGE2) | 14750 | Cayman, Ann Arbor, MI, USA |
| Prostaglandin D2 (PGD2) | 12010 | Cayman, Ann Arbor, MI, USA |
| Thromboxane B2 (TXB2) | 19030 | Cayman, Ann Arbor, MI, USA |
| Etomoxir | 11969 | Cayman, Ann Arbor, MI, USA |
| Saponin | SAE0073 | Sigma-Aldrich, St. Louis, MO, USA |
| Celecoxib | 10008672 | Cayman, Ann Arbor, MI, USA |
| Pyrrophenone | 13294 | Cayman, Ann Arbor, MI, USA |
| Zileuton | 10006967 | Cayman, Ann Arbor, MI, USA |
| ML-355 | 18537 | Cayman, Ann Arbor, MI, USA |
| ONO-8713 (EP1 antagonist) |  | Ono Pharmaceutical, Osaka, Japan |
| PF-04418948 (EP2 antagonist) | 15016 | Cayman, Ann Arbor, MI, USA |
| ONO-AE3-240 (EP3 antagonist) |  | Ono Pharmaceutical, Osaka, Japan |
| ONO-AE3-208 (EP4 antagonist) |  | Ono Pharmaceutical, Osaka, Japan |
