# Supplementary material for: Reprogramming of arachidonate metabolism confers drug resistance to glioblastoma through Enhancing Mitochondrial Activity in Fatty Acid Oxidation
Source: Research Square preprint supplement (doi:10.21203/rs.3.rs-965026/v1), 2021-10-18
Supplement: Supplementary file 1 [file 9c61d652dd908daca159e6af.docx]

**Supplementary Table 2. Characteristic of 5 GBM patients with recurrence involved in ω-3/6 fatty acid targeted metabolomics analysis**

| **Characteristics** | **Patient 1** | **Patient 2** | **Patient 3** | **Patient 4** | **Patient 5** |
| --- | --- | --- | --- | --- | --- |
| **Age at diagnosis** | 32 | 33 | 75 | 26 | 35 |
| **Gender** | Female | Male | Female | Female | Male |
| **Primary**  **pathology** | WHO grade Ⅳ  GBM | WHO grade Ⅳ  GBM | WHO grade Ⅳ  GBM | WHO grade Ⅱ  Diffuse astrocytoma | WHO grade Ⅱ  Diffuse astrocytoma |
| **Recurrent**  **pathology** | WHO grade Ⅳ  GBM | WHO grade Ⅳ  GBM | WHO grade Ⅳ  GBM | WHO grade Ⅲ  Anaplastic astrocytoma | WHO grade Ⅳ  GBM |
| **Month without recurrence** | 12 | 4 | 16 | 36 | 29 |
| **GBM-PNETA** |  | YES |  |  |  |
| **IDH-1** | Mutant | Mutant | Wild type | Mutant | Mutant |
| **GFAP** | Positive | Positive | No description | Positive | Positive |
| **P53** | Positive | No description | No description | Mutant | Mutant |
| **MGMT** | No description | Positive | No description | Positive | Negative |
| **PGE2** | Significant | Significant | Significant | Slight | Significant |
