# Supplementary material for: Reprogramming of arachidonate metabolism confers drug resistance to glioblastoma through Enhancing Mitochondrial Activity in Fatty Acid Oxidation
Source: Research Square preprint supplement (doi:10.21203/rs.3.rs-965026/v1), 2021-10-18
Supplement: Supplementary file 3 [file ba20fe1f53eb79b5da17c1da.docx]

**Supplementary Table 5. The antibodies used in this study**

| Antibody | Cat. Number | Company | Dilution |
| --- | --- | --- | --- |
| ACAA2 | Ab128911 | Abcam, Cambridge, UK | 1:1000 |
| CPT1A | A5307 | ABclonal, Woburn, MA, USA | 1:1000 |
| GAPDH | 60004-1-lg | Proteintech Group, Chicago, IL, USA | 1:1000 |
| GFP | 632592 | Takara Clontech Laboratories, Inc., CA, USA | 1:5000 |
| LDHA | GTX101416 | GeneTex, Inc., Irvine, CA, USA | 1:1000 |
| MFN1 | A9880 | ABclonal, Woburn, MA, USA | 1:1000 |
| MFN2 | GTX134774 | GeneTex, Inc., Irvine, CA, USA | 1:1000 |
| NQO1 | GTX113336 | GeneTex, Inc., Irvine, CA, USA | 1:1000 |
| OPA1 | GTX129917 | GeneTex, Inc., Irvine, CA, USA | 1:1000 |
| PTGES2 | A13440 | ABclonal, Woburn, MA, USA | 1:1000 |
| PTGS2 | A1253 | ABclonal, Woburn, MA, USA | 1:1000 |
| α-Tubulin | 66031-1-lg | Proteintech Group, Chicago, IL, USA | 1:5000 |
| β-Actin | 66009-1-lg | Proteintech Group, Chicago, IL, USA | 1:5000 |
